# Supplementary material
Source: publisher figshare collection journal article supplement (https://f1000.figshare.com/ndownloader/files/234563)
Supplement: Supplementary file 1 [file 234563]

Date	Hour	Minute	Air temperature
03/01/2003 00:15:00	0	15	10.2
03/01/2003 00:30:00	0	30	10.5
03/01/2003 00:45:00	0	45	10.3
03/01/2003 01:00:00	1	0	10.1
03/01/2003 01:15:00	1	15	10
03/01/2003 01:30:00	1	30	10.1
03/01/2003 01:45:00	1	45	11.6
03/01/2003 02:00:00	2	0	10.6
03/01/2003 02:15:00	2	15	10.9
03/01/2003 02:30:00	2	30	10
03/01/2003 02:45:00	2	45	10.1
03/01/2003 03:00:00	3	0	10
03/01/2003 03:15:00	3	15	10.3
03/01/2003 03:30:00	3	30	10
03/01/2003 03:45:00	3	45	10
03/01/2003 04:00:00	4	0	10.4
03/01/2003 04:15:00	4	15	10.5
03/01/2003 04:30:00	4	30	10
03/01/2003 04:45:00	4	45	10.1
03/01/2003 05:00:00	5	0	10.7
03/01/2003 05:15:00	5	15	10.3
03/01/2003 05:30:00	5	30	11
03/01/2003 05:45:00	5	45	11
03/01/2003 06:00:00	6	0	9.9
03/01/2003 06:15:00	6	15	11.4
03/01/2003 06:30:00	6	30	12.1
03/01/2003 06:45:00	6	45	13.5
03/01/2003 07:00:00	7	0	15.9
03/01/2003 07:15:00	7	15	16.7
03/01/2003 07:30:00	7	30	18.4
03/01/2003 07:45:00	7	45	19.4
03/01/2003 08:00:00	8	0	20.6
03/01/2003 08:15:00	8	15	21.4
03/01/2003 08:30:00	8	30	21.4
03/01/2003 08:45:00	8	45	21.3
03/01/2003 09:00:00	9	0	20.7
03/01/2003 09:15:00	9	15	20.5
03/01/2003 09:30:00	9	30	20.5
03/01/2003 09:45:00	9	45	20.8
03/01/2003 10:00:00	10	0	20.1
03/01/2003 10:15:00	10	15	20.1
03/01/2003 10:30:00	10	30	19.9
03/01/2003 10:45:00	10	45	20.1
03/01/2003 11:00:00	11	0	20.1
03/01/2003 11:15:00	11	15	20
03/01/2003 11:30:00	11	30	20.1
03/01/2003 11:45:00	11	45	20.1
03/01/2003 12:00:00	12	0	20.2
03/01/2003 12:15:00	12	15	21
03/01/2003 12:30:00	12	30	22.1
03/01/2003 12:45:00	12	45	23.7
03/01/2003 13:00:00	13	0	23.8
03/01/2003 13:15:00	13	15	24.9
03/01/2003 13:30:00	13	30	25.5
03/01/2003 13:45:00	13	45	25
03/01/2003 14:00:00	14	0	24
03/01/2003 14:15:00	14	15	22.9
03/01/2003 14:30:00	14	30	22.2
03/01/2003 14:45:00	14	45	21.8
03/01/2003 15:00:00	15	0	20.9
03/01/2003 15:15:00	15	15	19.7
03/01/2003 15:30:00	15	30	19.7
03/01/2003 15:45:00	15	45	19.6
03/01/2003 16:00:00	16	0	19.8
03/01/2003 16:15:00	16	15	19.9
03/01/2003 16:30:00	16	30	20
03/01/2003 16:45:00	16	45	20.1
03/01/2003 17:00:00	17	0	20.1
03/01/2003 17:15:00	17	15	20.4
03/01/2003 17:30:00	17	30	20.6
03/01/2003 17:45:00	17	45	20.4
03/01/2003 18:00:00	18	0	20.1
03/01/2003 18:15:00	18	15	20.6
03/01/2003 18:30:00	18	30	20.4
03/01/2003 18:45:00	18	45	20.6
03/01/2003 19:00:00	19	0	21.1
03/01/2003 19:15:00	19	15	20.6
03/01/2003 19:30:00	19	30	19
03/01/2003 19:45:00	19	45	17.7
03/01/2003 20:00:00	20	0	16.4
03/01/2003 20:15:00	20	15	15.5
03/01/2003 20:30:00	20	30	14.9
03/01/2003 20:45:00	20	45	12.5
03/01/2003 21:00:00	21	0	11.7
03/01/2003 21:15:00	21	15	11
03/01/2003 21:30:00	21	30	10
03/01/2003 21:45:00	21	45	10.5
03/01/2003 22:00:00	22	0	10.6
03/01/2003 22:15:00	22	15	10.4
03/01/2003 22:30:00	22	30	10.8
03/01/2003 22:45:00	22	45	10.8
03/01/2003 23:00:00	23	0	11.1
03/01/2003 23:15:00	23	15	10.7
03/01/2003 23:30:00	23	30	10.6
03/01/2003 23:45:00	23	45	10.9
03/02/2003 00:00:00	0	0	11
03/02/2003 00:15:00	0	15	11.1
03/02/2003 00:30:00	0	30	10.6
03/02/2003 00:45:00	0	45	10.7
03/02/2003 01:00:00	1	0	11.2
03/02/2003 01:15:00	1	15	10.6
03/02/2003 01:30:00	1	30	11.1
03/02/2003 01:45:00	1	45	11.1
03/02/2003 02:00:00	2	0	10.5
03/02/2003 02:15:00	2	15	11
03/02/2003 02:30:00	2	30	10.7
03/02/2003 02:45:00	2	45	11
03/02/2003 03:00:00	3	0	10.6
03/02/2003 03:15:00	3	15	11
03/02/2003 03:30:00	3	30	10.9
03/02/2003 03:45:00	3	45	10.7
03/02/2003 04:00:00	4	0	10.7
03/02/2003 04:15:00	4	15	11
03/02/2003 04:30:00	4	30	10.8
03/02/2003 04:45:00	4	45	10.8
03/02/2003 05:00:00	5	0	11.1
03/02/2003 05:15:00	5	15	10.3
03/02/2003 05:30:00	5	30	11
03/02/2003 05:45:00	5	45	11
03/02/2003 06:00:00	6	0	11.2
03/02/2003 06:15:00	6	15	11.2
03/02/2003 06:30:00	6	30	12.4
03/02/2003 06:45:00	6	45	13.1
03/02/2003 07:00:00	7	0	14.5
03/02/2003 07:15:00	7	15	15.2
03/02/2003 07:30:00	7	30	16.8
03/02/2003 07:45:00	7	45	18
03/02/2003 08:00:00	8	0	18.9
03/02/2003 08:15:00	8	15	19.5
03/02/2003 08:30:00	8	30	19.9
03/02/2003 08:45:00	8	45	20
03/02/2003 09:00:00	9	0	19.5
03/02/2003 09:15:00	9	15	19.7
03/02/2003 09:30:00	9	30	19.7
03/02/2003 09:45:00	9	45	19.5
03/02/2003 10:00:00	10	0	19.9
03/02/2003 10:15:00	10	15	19.5
03/02/2003 10:30:00	10	30	19.7
03/02/2003 10:45:00	10	45	19.4
03/02/2003 11:00:00	11	0	20.4
03/02/2003 11:15:00	11	15	19.7
03/02/2003 11:30:00	11	30	19.5
03/02/2003 11:45:00	11	45	20
03/02/2003 12:00:00	12	0	20.1
03/02/2003 12:15:00	12	15	20.2
03/02/2003 12:30:00	12	30	20.2
03/02/2003 12:45:00	12	45	20.1
03/02/2003 13:00:00	13	0	20.1
03/02/2003 13:15:00	13	15	20
03/02/2003 13:30:00	13	30	20.1
03/02/2003 13:45:00	13	45	20.1
03/02/2003 14:00:00	14	0	20.7
03/02/2003 14:15:00	14	15	21.1
03/02/2003 14:30:00	14	30	20.7
03/02/2003 14:45:00	14	45	20.1
03/02/2003 15:00:00	15	0	20.1
03/02/2003 15:15:00	15	15	20
03/02/2003 15:30:00	15	30	20
03/02/2003 15:45:00	15	45	19.9
03/02/2003 16:00:00	16	0	20
03/02/2003 16:15:00	16	15	20.3
03/02/2003 16:30:00	16	30	21.2
03/02/2003 16:45:00	16	45	21
03/02/2003 17:00:00	17	0	21.8
03/02/2003 17:15:00	17	15	20.8
03/02/2003 17:30:00	17	30	21.6
03/02/2003 17:45:00	17	45	21.5
03/02/2003 18:00:00	18	0	21.1
03/02/2003 18:15:00	18	15	21.7
03/02/2003 18:30:00	18	30	21.6
03/02/2003 18:45:00	18	45	21.1
03/02/2003 19:00:00	19	0	21.4
03/02/2003 19:15:00	19	15	20.8
03/02/2003 19:30:00	19	30	20.2
03/02/2003 19:45:00	19	45	18.5
03/02/2003 20:00:00	20	0	17.1
03/02/2003 20:15:00	20	15	15.4
03/02/2003 20:30:00	20	30	13.7
03/02/2003 20:45:00	20	45	13.7
03/02/2003 21:00:00	21	0	10.9
03/02/2003 21:15:00	21	15	10.3
03/02/2003 21:30:00	21	30	11.2
03/02/2003 21:45:00	21	45	10.9
03/02/2003 22:00:00	22	0	9.9
03/02/2003 22:15:00	22	15	11
03/02/2003 22:30:00	22	30	11.1
03/02/2003 22:45:00	22	45	10.9
03/02/2003 23:00:00	23	0	10.8
03/02/2003 23:15:00	23	15	11.3
03/02/2003 23:30:00	23	30	10.3
03/02/2003 23:45:00	23	45	11.2
03/03/2003 00:00:00	0	0	10.9
03/03/2003 00:15:00	0	15
03/03/2003 00:30:00	0	30	10.3
03/03/2003 00:45:00	0	45	11.1
03/03/2003 01:00:00	1	0	10.7
03/03/2003 01:15:00	1	15	10.9
03/03/2003 01:30:00	1	30	10.6
03/03/2003 01:45:00	1	45	10.9
03/03/2003 02:00:00	2	0	10.8
03/03/2003 02:15:00	2	15	10.9
03/03/2003 02:30:00	2	30	10.9
03/03/2003 02:45:00	2	45	11.1
03/03/2003 03:00:00	3	0	11
03/03/2003 03:15:00	3	15	10.5
03/03/2003 03:30:00	3	30	10.9
03/03/2003 03:45:00	3	45	10.4
03/03/2003 04:00:00	4	0	10.7
03/03/2003 04:15:00	4	15	10.3
03/03/2003 04:30:00	4	30	10.7
03/03/2003 04:45:00	4	45	10.6
03/03/2003 05:00:00	5	0	10.6
03/03/2003 05:15:00	5	15	11.1
03/03/2003 05:30:00	5	30	10.7
03/03/2003 05:45:00	5	45	10.9
03/03/2003 06:00:00	6	0	10.5
03/03/2003 06:15:00	6	15	11.3
03/03/2003 06:30:00	6	30	11.9
03/03/2003 06:45:00	6	45	13.4
03/03/2003 07:00:00	7	0	14
03/03/2003 07:15:00	7	15	15.6
03/03/2003 07:30:00	7	30	16.6
03/03/2003 07:45:00	7	45	17.7
03/03/2003 08:00:00	8	0	19
03/03/2003 08:15:00	8	15	19.9
03/03/2003 08:30:00	8	30	19.6
03/03/2003 08:45:00	8	45	20.1
03/03/2003 09:00:00	9	0	19.7
03/03/2003 09:15:00	9	15	20.2
03/03/2003 09:30:00	9	30	19.7
03/03/2003 09:45:00	9	45	20.6
03/03/2003 10:00:00	10	0	19.9
03/03/2003 10:15:00	10	15	19.7
03/03/2003 10:30:00	10	30	20.5
03/03/2003 10:45:00	10	45	19.5
03/03/2003 11:00:00	11	0	21
03/03/2003 11:15:00	11	15	19.7
03/03/2003 11:30:00	11	30	19.2
03/03/2003 11:45:00	11	45	20.1
03/03/2003 12:00:00	12	0	19.9
03/03/2003 12:15:00	12	15	19.6
03/03/2003 12:30:00	12	30	19.6
03/03/2003 12:45:00	12	45	19.9
03/03/2003 13:00:00	13	0	19.6
03/03/2003 13:15:00	13	15	19.6
03/03/2003 13:30:00	13	30	19.8
03/03/2003 13:45:00	13	45	19.9
03/03/2003 14:00:00	14	0	19.8
03/03/2003 14:15:00	14	15	19.6
03/03/2003 14:30:00	14	30	20
03/03/2003 14:45:00	14	45	19.9
03/03/2003 15:00:00	15	0	20.7
03/03/2003 15:15:00	15	15	20
03/03/2003 15:30:00	15	30	20.1
03/03/2003 15:45:00	15	45	20.7
03/03/2003 16:00:00	16	0	20.8
03/03/2003 16:15:00	16	15	20.1
03/03/2003 16:30:00	16	30	20.1
03/03/2003 16:45:00	16	45	21.2
03/03/2003 17:00:00	17	0	21.1
03/03/2003 17:15:00	17	15	21.4
03/03/2003 17:30:00	17	30	20.9
03/03/2003 17:45:00	17	45	21.1
03/03/2003 18:00:00	18	0	20.6
03/03/2003 18:15:00	18	15	21.2
03/03/2003 18:30:00	18	30	20.7
03/03/2003 18:45:00	18	45	21.1
03/03/2003 19:00:00	19	0	20.6
03/03/2003 19:15:00	19	15	20.6
03/03/2003 19:30:00	19	30	19.1
03/03/2003 19:45:00	19	45	18
03/03/2003 20:00:00	20	0	16.5
03/03/2003 20:15:00	20	15	14.5
03/03/2003 20:30:00	20	30	13.7
03/03/2003 20:45:00	20	45	12.6
03/03/2003 21:00:00	21	0	11.1
03/03/2003 21:15:00	21	15	10
03/03/2003 21:30:00	21	30	10
03/03/2003 21:45:00	21	45	10.2
03/03/2003 22:00:00	22	0	9.9
03/03/2003 22:15:00	22	15	9.8
03/03/2003 22:30:00	22	30	10.4
03/03/2003 22:45:00	22	45	10.5
03/03/2003 23:00:00	23	0	9.8
03/03/2003 23:15:00	23	15	10.5
03/03/2003 23:30:00	23	30	10.5
03/03/2003 23:45:00	23	45	11.1
03/04/2003 00:00:00	0	0	10.5
03/04/2003 00:15:00	0	15	10.3
03/04/2003 00:30:00	0	30	11.1
03/04/2003 00:45:00	0	45	10.4
03/04/2003 01:00:00	1	0	11.4
03/04/2003 01:15:00	1	15	10.5
03/04/2003 01:30:00	1	30	10.7
03/04/2003 01:45:00	1	45	10.9
03/04/2003 02:00:00	2	0	10.9
03/04/2003 02:15:00	2	15	10.8
03/04/2003 02:30:00	2	30	10.8
03/04/2003 02:45:00	2	45	10.8
03/04/2003 03:00:00	3	0	10.7
03/04/2003 03:15:00	3	15	10.6
03/04/2003 03:30:00	3	30	11.6
03/04/2003 03:45:00	3	45	11
03/04/2003 04:00:00	4	0	10.8
03/04/2003 04:15:00	4	15	11.1
03/04/2003 04:30:00	4	30	10.6
03/04/2003 04:45:00	4	45	10.6
03/04/2003 05:00:00	5	0	11.5
03/04/2003 05:15:00	5	15	10.6
03/04/2003 05:30:00	5	30	11.1
03/04/2003 05:45:00	5	45	10.5
03/04/2003 06:00:00	6	0	10.3
03/04/2003 06:15:00	6	15	11.4
03/04/2003 06:30:00	6	30	12.6
03/04/2003 06:45:00	6	45	13.9
03/04/2003 07:00:00	7	0	15
03/04/2003 07:15:00	7	15	16
03/04/2003 07:30:00	7	30	16.9
03/04/2003 07:45:00	7	45	18.2
03/04/2003 08:00:00	8	0	19.1
03/04/2003 08:15:00	8	15	20.1
03/04/2003 08:30:00	8	30	19.9
03/04/2003 08:45:00	8	45	20.2
03/04/2003 09:00:00	9	0	19.8
03/04/2003 09:15:00	9	15	20.4
03/04/2003 09:30:00	9	30	20.2
03/04/2003 09:45:00	9	45	20.6
03/04/2003 10:00:00	10	0	20.5
03/04/2003 10:15:00	10	15	20.5
03/04/2003 10:30:00	10	30	20.3
03/04/2003 10:45:00	10	45	20
03/04/2003 11:00:00	11	0	20.1
03/04/2003 11:15:00	11	15	20.1
03/04/2003 11:30:00	11	30	20
03/04/2003 11:45:00	11	45	20
03/04/2003 12:00:00	12	0	20.1
03/04/2003 12:15:00	12	15	20.8
03/04/2003 12:30:00	12	30	21
03/04/2003 12:45:00	12	45	20
03/04/2003 13:00:00	13	0	21.6
03/04/2003 13:15:00	13	15	21.7
03/04/2003 13:30:00	13	30	22.7
03/04/2003 13:45:00	13	45	22.4
03/04/2003 14:00:00	14	0	22.2
03/04/2003 14:15:00	14	15	19.7
03/04/2003 14:30:00	14	30	20
03/04/2003 14:45:00	14	45	21.3
03/04/2003 15:00:00	15	0	21
03/04/2003 15:15:00	15	15	21.2
03/04/2003 15:30:00	15	30	19.8
03/04/2003 15:45:00	15	45	19.6
03/04/2003 16:00:00	16	0	19.8
03/04/2003 16:15:00	16	15	20.3
03/04/2003 16:30:00	16	30	20.5
03/04/2003 16:45:00	16	45	20.6
03/04/2003 17:00:00	17	0	19.5
03/04/2003 17:15:00	17	15	19.7
03/04/2003 17:30:00	17	30	20.3
03/04/2003 17:45:00	17	45	20.8
03/04/2003 18:00:00	18	0	20.7
03/04/2003 18:15:00	18	15	20.7
03/04/2003 18:30:00	18	30	20.3
03/04/2003 18:45:00	18	45	21.1
03/04/2003 19:00:00	19	0	21.7
03/04/2003 19:15:00	19	15	21.2
03/04/2003 19:30:00	19	30	19.8
03/04/2003 19:45:00	19	45	17.3
03/04/2003 20:00:00	20	0	17.5
03/04/2003 20:15:00	20	15	14.8
03/04/2003 20:30:00	20	30	15.2
03/04/2003 20:45:00	20	45	12.8
03/04/2003 21:00:00	21	0	11.1
03/04/2003 21:15:00	21	15	10.4
03/04/2003 21:30:00	21	30	10.1
03/04/2003 21:45:00	21	45	11.6
03/04/2003 22:00:00	22	0	10.2
03/04/2003 22:15:00	22	15	11.1
03/04/2003 22:30:00	22	30	10.4
03/04/2003 22:45:00	22	45	10.7
03/04/2003 23:00:00	23	0	11.1
03/04/2003 23:15:00	23	15	11.2
03/04/2003 23:30:00	23	30	10.6
03/04/2003 23:45:00	23	45	11.2
03/05/2003 00:00:00	0	0	10.6
03/05/2003 00:15:00	0	15	11.1
03/05/2003 00:30:00	0	30	10.4
03/05/2003 00:45:00	0	45	10.7
03/05/2003 01:00:00	1	0	10.8
03/05/2003 01:15:00	1	15	10.6
03/05/2003 01:30:00	1	30	11.1
03/05/2003 01:45:00	1	45	10.4
03/05/2003 02:00:00	2	0	11
03/05/2003 02:15:00	2	15	10.3
03/05/2003 02:30:00	2	30	10.8
03/05/2003 02:45:00	2	45	11.3
03/05/2003 03:00:00	3	0	11.1
03/05/2003 03:15:00	3	15	10.6
03/05/2003 03:30:00	3	30	11.3
03/05/2003 03:45:00	3	45	11
03/05/2003 04:00:00	4	0	10.6
03/05/2003 04:15:00	4	15	10.9
03/05/2003 04:30:00	4	30	10.8
03/05/2003 04:45:00	4	45	10.9
03/05/2003 05:00:00	5	0	10.8
03/05/2003 05:15:00	5	15	10.8
03/05/2003 05:30:00	5	30	10.8
03/05/2003 05:45:00	5	45	10.9
03/05/2003 06:00:00	6	0	10.7
03/05/2003 06:15:00	6	15	10.7
03/05/2003 06:30:00	6	30	12.1
03/05/2003 06:45:00	6	45	13.8
03/05/2003 07:00:00	7	0	14.3
03/05/2003 07:15:00	7	15	15.6
03/05/2003 07:30:00	7	30	16.6
03/05/2003 07:45:00	7	45	18.1
03/05/2003 08:00:00	8	0	19
03/05/2003 08:15:00	8	15	20
03/05/2003 08:30:00	8	30	19.8
03/05/2003 08:45:00	8	45	20
03/05/2003 09:00:00	9	0	19.7
03/05/2003 09:15:00	9	15	20.1
03/05/2003 09:30:00	9	30	19.7
03/05/2003 09:45:00	9	45	20.4
03/05/2003 10:00:00	10	0	20
03/05/2003 10:15:00	10	15	20
03/05/2003 10:30:00	10	30	19.6
03/05/2003 10:45:00	10	45	19.4
03/05/2003 11:00:00	11	0	20.1
03/05/2003 11:15:00	11	15	20
03/05/2003 11:30:00	11	30	20.1
03/05/2003 11:45:00	11	45	20.4
03/05/2003 12:00:00	12	0	21.4
03/05/2003 12:15:00	12	15	22.6
03/05/2003 12:30:00	12	30	23.6
03/05/2003 12:45:00	12	45	24.6
03/05/2003 13:00:00	13	0	24.7
03/05/2003 13:15:00	13	15	24.5
03/05/2003 13:30:00	13	30	24.7
03/05/2003 13:45:00	13	45	24.6
03/05/2003 14:00:00	14	0	24.5
03/05/2003 14:15:00	14	15	24.3
03/05/2003 14:30:00	14	30	23.6
03/05/2003 14:45:00	14	45	24
03/05/2003 15:00:00	15	0	23.5
03/05/2003 15:15:00	15	15	23.7
03/05/2003 15:30:00	15	30	23.9
03/05/2003 15:45:00	15	45	23
03/05/2003 16:00:00	16	0	22.6
03/05/2003 16:15:00	16	15	22.1
03/05/2003 16:30:00	16	30	20.3
03/05/2003 16:45:00	16	45	20.4
03/05/2003 17:00:00	17	0	21.2
03/05/2003 17:15:00	17	15	20.4
03/05/2003 17:30:00	17	30	19.6
03/05/2003 17:45:00	17	45	19.5
03/05/2003 18:00:00	18	0	21
03/05/2003 18:15:00	18	15	20.9
03/05/2003 18:30:00	18	30	20.8
03/05/2003 18:45:00	18	45	20.6
03/05/2003 19:00:00	19	0	21.3
03/05/2003 19:15:00	19	15	21
03/05/2003 19:30:00	19	30	19.7
03/05/2003 19:45:00	19	45	18.7
03/05/2003 20:00:00	20	0	16.5
03/05/2003 20:15:00	20	15	15.8
03/05/2003 20:30:00	20	30	14.3
03/05/2003 20:45:00	20	45	12.3
03/05/2003 21:00:00	21	0	11.2
03/05/2003 21:15:00	21	15	9.9
03/05/2003 21:30:00	21	30	10.7
03/05/2003 21:45:00	21	45	10.9
03/05/2003 22:00:00	22	0	9.9
03/05/2003 22:15:00	22	15	10.9
03/05/2003 22:30:00	22	30	10.3
03/05/2003 22:45:00	22	45	11
03/05/2003 23:00:00	23	0	10.6
03/05/2003 23:15:00	23	15	10.6
03/05/2003 23:30:00	23	30	11
03/05/2003 23:45:00	23	45	11
03/06/2003 00:00:00	0	0	10.7
03/06/2003 00:15:00	0	15	11
03/06/2003 00:30:00	0	30	10.5
03/06/2003 00:45:00	0	45	11.2
03/06/2003 01:00:00	1	0	10.8
03/06/2003 01:15:00	1	15	10.6
03/06/2003 01:30:00	1	30	10.6
03/06/2003 01:45:00	1	45	11.1
03/06/2003 02:00:00	2	0	10.6
03/06/2003 02:15:00	2	15	10.9
03/06/2003 02:30:00	2	30	10.9
03/06/2003 02:45:00	2	45	10.7
03/06/2003 03:00:00	3	0	10.3
03/06/2003 03:15:00	3	15	10.9
03/06/2003 03:30:00	3	30	10.7
03/06/2003 03:45:00	3	45	11
03/06/2003 04:00:00	4	0	10.9
03/06/2003 04:15:00	4	15	10.9
03/06/2003 04:30:00	4	30	10.8
03/06/2003 04:45:00	4	45	10.9
03/06/2003 05:00:00	5	0	10.9
03/06/2003 05:15:00	5	15	10.7
03/06/2003 05:30:00	5	30	10.5
03/06/2003 05:45:00	5	45	11.2
03/06/2003 06:00:00	6	0	10.3
03/06/2003 06:15:00	6	15	11.1
03/06/2003 06:30:00	6	30	11.9
03/06/2003 06:45:00	6	45	13.4
03/06/2003 07:00:00	7	0	14.1
03/06/2003 07:15:00	7	15	15.5
03/06/2003 07:30:00	7	30	16.7
03/06/2003 07:45:00	7	45	17.7
03/06/2003 08:00:00	8	0	19.1
03/06/2003 08:15:00	8	15	19.8
03/06/2003 08:30:00	8	30	19.9
03/06/2003 08:45:00	8	45	19.9
03/06/2003 09:00:00	9	0	20
03/06/2003 09:15:00	9	15	20.1
03/06/2003 09:30:00	9	30	20.5
03/06/2003 09:45:00	9	45	20.6
03/06/2003 10:00:00	10	0	20.9
03/06/2003 10:15:00	10	15	19.9
03/06/2003 10:30:00	10	30	19.3
03/06/2003 10:45:00	10	45	19.2
03/06/2003 11:00:00	11	0	20
03/06/2003 11:15:00	11	15	20
03/06/2003 11:30:00	11	30	20.4
03/06/2003 11:45:00	11	45	20.3
03/06/2003 12:00:00	12	0	19.8
03/06/2003 12:15:00	12	15	20.2
03/06/2003 12:30:00	12	30	20.6
03/06/2003 12:45:00	12	45	20.8
03/06/2003 13:00:00	13	0	22.5
03/06/2003 13:15:00	13	15	22.9
03/06/2003 13:30:00	13	30	22.7
03/06/2003 13:45:00	13	45	22.3
03/06/2003 14:00:00	14	0	21.3
03/06/2003 14:15:00	14	15	23.1
03/06/2003 14:30:00	14	30	23
03/06/2003 14:45:00	14	45	23.4
03/06/2003 15:00:00	15	0	22.9
03/06/2003 15:15:00	15	15	22.3
03/06/2003 15:30:00	15	30	20.8
03/06/2003 15:45:00	15	45	19.8
03/06/2003 16:00:00	16	0	19.9
03/06/2003 16:15:00	16	15	20.2
03/06/2003 16:30:00	16	30	19.5
03/06/2003 16:45:00	16	45	19
03/06/2003 17:00:00	17	0	20
03/06/2003 17:15:00	17	15	19.5
03/06/2003 17:30:00	17	30	19.6
03/06/2003 17:45:00	17	45	21.4
03/06/2003 18:00:00	18	0	20.9
03/06/2003 18:15:00	18	15	20.9
03/06/2003 18:30:00	18	30	21.7
03/06/2003 18:45:00	18	45	20.9
03/06/2003 19:00:00	19	0	20.8
03/06/2003 19:15:00	19	15	21.4
03/06/2003 19:30:00	19	30	19.6
03/06/2003 19:45:00	19	45	18.3
03/06/2003 20:00:00	20	0	16.8
03/06/2003 20:15:00	20	15	15.1
03/06/2003 20:30:00	20	30	13.9
03/06/2003 20:45:00	20	45	13
03/06/2003 21:00:00	21	0	12.3
03/06/2003 21:15:00	21	15	11.7
03/06/2003 21:30:00	21	30	11.4
03/06/2003 21:45:00	21	45	11.1
03/06/2003 22:00:00	22	0	10.8
03/06/2003 22:15:00	22	15	10.3
03/06/2003 22:30:00	22	30	9.9
03/06/2003 22:45:00	22	45	10.2
03/06/2003 23:00:00	23	0	10
03/06/2003 23:15:00	23	15	9.8
03/06/2003 23:30:00	23	30	10
03/06/2003 23:45:00	23	45	9.8
03/07/2003 00:00:00	0	0	9.9
03/07/2003 00:15:00	0	15
03/07/2003 00:30:00	0	30	9.9
03/07/2003 00:45:00	0	45	10.1
03/07/2003 01:00:00	1	0	10
03/07/2003 01:15:00	1	15	10
03/07/2003 01:30:00	1	30	10
03/07/2003 01:45:00	1	45	10
03/07/2003 02:00:00	2	0	10
03/07/2003 02:15:00	2	15	10
03/07/2003 02:30:00	2	30	10
03/07/2003 02:45:00	2	45	9.9
03/07/2003 03:00:00	3	0	10
03/07/2003 03:15:00	3	15	10
03/07/2003 03:30:00	3	30	10.1
03/07/2003 03:45:00	3	45	10
03/07/2003 04:00:00	4	0	10.2
03/07/2003 04:15:00	4	15	10
03/07/2003 04:30:00	4	30	10.2
03/07/2003 04:45:00	4	45	10.1
03/07/2003 05:00:00	5	0	9.9
03/07/2003 05:15:00	5	15	10.1
03/07/2003 05:30:00	5	30	9.9
03/07/2003 05:45:00	5	45	11.6
03/07/2003 06:00:00	6	0	10.2
03/07/2003 06:15:00	6	15	10.8
03/07/2003 06:30:00	6	30	12.5
03/07/2003 06:45:00	6	45	13.2
03/07/2003 07:00:00	7	0	15
03/07/2003 07:15:00	7	15	16.7
03/07/2003 07:30:00	7	30	17.5
03/07/2003 07:45:00	7	45	19.1
03/07/2003 08:00:00	8	0	19.9
03/07/2003 08:15:00	8	15	20.8
03/07/2003 08:30:00	8	30	20.7
03/07/2003 08:45:00	8	45	20.9
03/07/2003 09:00:00	9	0	20.6
03/07/2003 09:15:00	9	15	20.7
03/07/2003 09:30:00	9	30	20.4
03/07/2003 09:45:00	9	45	20.3
03/07/2003 10:00:00	10	0	20
03/07/2003 10:15:00	10	15	20.6
03/07/2003 10:30:00	10	30	19.8
03/07/2003 10:45:00	10	45	19.2
03/07/2003 11:00:00	11	0	19.4
03/07/2003 11:15:00	11	15	20.2
03/07/2003 11:30:00	11	30	20.4
03/07/2003 11:45:00	11	45	21
03/07/2003 12:00:00	12	0	22.1
03/07/2003 12:15:00	12	15	23.2
03/07/2003 12:30:00	12	30	24.2
03/07/2003 12:45:00	12	45	25.2
03/07/2003 13:00:00	13	0	24.8
03/07/2003 13:15:00	13	15	25
03/07/2003 13:30:00	13	30	25.5
03/07/2003 13:45:00	13	45	25.2
03/07/2003 14:00:00	14	0	25.3
03/07/2003 14:15:00	14	15	24.7
03/07/2003 14:30:00	14	30	24.2
03/07/2003 14:45:00	14	45	23.9
03/07/2003 15:00:00	15	0	23.9
03/07/2003 15:15:00	15	15	24.5
03/07/2003 15:30:00	15	30	24
03/07/2003 15:45:00	15	45	23.2
03/07/2003 16:00:00	16	0	22.4
03/07/2003 16:15:00	16	15	20.9
03/07/2003 16:30:00	16	30	19.8
03/07/2003 16:45:00	16	45	19.7
03/07/2003 17:00:00	17	0	20
03/07/2003 17:15:00	17	15	19.9
03/07/2003 17:30:00	17	30	20.4
03/07/2003 17:45:00	17	45	20.9
03/07/2003 18:00:00	18	0	20.8
03/07/2003 18:15:00	18	15	21.6
03/07/2003 18:30:00	18	30	21.6
03/07/2003 18:45:00	18	45	21
03/07/2003 19:00:00	19	0	20.9
03/07/2003 19:15:00	19	15	20.8
03/07/2003 19:30:00	19	30	19.3
03/07/2003 19:45:00	19	45	17.7
03/07/2003 20:00:00	20	0	16.4
03/07/2003 20:15:00	20	15	16.5
03/07/2003 20:30:00	20	30	13.7
03/07/2003 20:45:00	20	45	13.4
03/07/2003 21:00:00	21	0	12.6
03/07/2003 21:15:00	21	15	10.5
03/07/2003 21:30:00	21	30	10.1
03/07/2003 21:45:00	21	45	10.3
03/07/2003 22:00:00	22	0	10.2
03/07/2003 22:15:00	22	15	10.1
03/07/2003 22:30:00	22	30	10.4
03/07/2003 22:45:00	22	45	10
03/07/2003 23:00:00	23	0	10.6
03/07/2003 23:15:00	23	15	10.1
03/07/2003 23:30:00	23	30	11.4
03/07/2003 23:45:00	23	45	10.4
03/08/2003 00:00:00	0	0	9.9
03/08/2003 00:15:00	0	15	9.9
03/08/2003 00:30:00	0	30	11
03/08/2003 00:45:00	0	45	11.6
03/08/2003 01:00:00	1	0	10.8
03/08/2003 01:15:00	1	15	10.1
03/08/2003 01:30:00	1	30	10.2
03/08/2003 01:45:00	1	45	10.5
03/08/2003 02:00:00	2	0	9.8
03/08/2003 02:15:00	2	15	11
03/08/2003 02:30:00	2	30	10.6
03/08/2003 02:45:00	2	45	10
03/08/2003 03:00:00	3	0	11.1
03/08/2003 03:15:00	3	15	10.6
03/08/2003 03:30:00	3	30	10.8
03/08/2003 03:45:00	3	45	10.6
03/08/2003 04:00:00	4	0	10.7
03/08/2003 04:15:00	4	15	10.6
03/08/2003 04:30:00	4	30	10.4
03/08/2003 04:45:00	4	45	10.4
03/08/2003 05:00:00	5	0	10.7
03/08/2003 05:15:00	5	15	10.9
03/08/2003 05:30:00	5	30	11.3
03/08/2003 05:45:00	5	45	10.7
03/08/2003 06:00:00	6	0	10.6
03/08/2003 06:15:00	6	15	11.4
03/08/2003 06:30:00	6	30	12.9
03/08/2003 06:45:00	6	45	13.6
03/08/2003 07:00:00	7	0	15
03/08/2003 07:15:00	7	15	15.5
03/08/2003 07:30:00	7	30	17.3
03/08/2003 07:45:00	7	45	18.1
03/08/2003 08:00:00	8	0	19.2
03/08/2003 08:15:00	8	15	20.3
03/08/2003 08:30:00	8	30	20.3
03/08/2003 08:45:00	8	45	20.2
03/08/2003 09:00:00	9	0	20.1
03/08/2003 09:15:00	9	15	19.8
03/08/2003 09:30:00	9	30	20.1
03/08/2003 09:45:00	9	45	19.9
03/08/2003 10:00:00	10	0	20.4
03/08/2003 10:15:00	10	15	19.4
03/08/2003 10:30:00	10	30	19.5
03/08/2003 10:45:00	10	45	20.2
03/08/2003 11:00:00	11	0	19.9
03/08/2003 11:15:00	11	15	19.6
03/08/2003 11:30:00	11	30	19.3
03/08/2003 11:45:00	11	45	20
03/08/2003 12:00:00	12	0	20.2
03/08/2003 12:15:00	12	15	20.3
03/08/2003 12:30:00	12	30	20.1
03/08/2003 12:45:00	12	45	20.3
03/08/2003 13:00:00	13	0	21.1
03/08/2003 13:15:00	13	15	22.3
03/08/2003 13:30:00	13	30	23
03/08/2003 13:45:00	13	45	23.4
03/08/2003 14:00:00	14	0	23.7
03/08/2003 14:15:00	14	15	23.2
03/08/2003 14:30:00	14	30	23.1
03/08/2003 14:45:00	14	45	22.8
03/08/2003 15:00:00	15	0	22.6
03/08/2003 15:15:00	15	15	22.2
03/08/2003 15:30:00	15	30	21.6
03/08/2003 15:45:00	15	45	20.3
03/08/2003 16:00:00	16	0	20.1
03/08/2003 16:15:00	16	15	20
03/08/2003 16:30:00	16	30	20
03/08/2003 16:45:00	16	45	20
03/08/2003 17:00:00	17	0	20
03/08/2003 17:15:00	17	15	19.8
03/08/2003 17:30:00	17	30	20.1
03/08/2003 17:45:00	17	45	20
03/08/2003 18:00:00	18	0	20.9
03/08/2003 18:15:00	18	15	20.6
03/08/2003 18:30:00	18	30	21
03/08/2003 18:45:00	18	45	21.3
03/08/2003 19:00:00	19	0	20.8
03/08/2003 19:15:00	19	15	21.1
03/08/2003 19:30:00	19	30	19.5
03/08/2003 19:45:00	19	45	18.6
03/08/2003 20:00:00	20	0	16.7
03/08/2003 20:15:00	20	15	15.6
03/08/2003 20:30:00	20	30	13.2
03/08/2003 20:45:00	20	45	12.4
03/08/2003 21:00:00	21	0	12.5
03/08/2003 21:15:00	21	15	10.5
03/08/2003 21:30:00	21	30	11.7
03/08/2003 21:45:00	21	45	10.7
03/08/2003 22:00:00	22	0	10
03/08/2003 22:15:00	22	15	10.1
03/08/2003 22:30:00	22	30	11.1
03/08/2003 22:45:00	22	45	10.3
03/08/2003 23:00:00	23	0	11.2
03/08/2003 23:15:00	23	15	11.2
03/08/2003 23:30:00	23	30	10.6
03/08/2003 23:45:00	23	45	10.8
03/09/2003 00:00:00	0	0	11.2
03/09/2003 00:15:00	0	15	10.7
03/09/2003 00:30:00	0	30	10.5
03/09/2003 00:45:00	0	45	10.6
03/09/2003 01:00:00	1	0	10.5
03/09/2003 01:15:00	1	15	11
03/09/2003 01:30:00	1	30	10.8
03/09/2003 01:45:00	1	45	10.7
03/09/2003 02:00:00	2	0	10.5
03/09/2003 02:15:00	2	15	11.2
03/09/2003 02:30:00	2	30	10.6
03/09/2003 02:45:00	2	45	11.2
03/09/2003 03:00:00	3	0	10.6
03/09/2003 03:15:00	3	15	10.4
03/09/2003 03:30:00	3	30	10.7
03/09/2003 03:45:00	3	45	11.2
03/09/2003 04:00:00	4	0	11
03/09/2003 04:15:00	4	15	10.5
03/09/2003 04:30:00	4	30	10.2
03/09/2003 04:45:00	4	45	11.2
03/09/2003 05:00:00	5	0	10.5
03/09/2003 05:15:00	5	15	10.7
03/09/2003 05:30:00	5	30	11
03/09/2003 05:45:00	5	45	10.4
03/09/2003 06:00:00	6	0	10.9
03/09/2003 06:15:00	6	15	11
03/09/2003 06:30:00	6	30	12.7
03/09/2003 06:45:00	6	45	13.3
03/09/2003 07:00:00	7	0	14.8
03/09/2003 07:15:00	7	15	15.5
03/09/2003 07:30:00	7	30	17
03/09/2003 07:45:00	7	45	17.8
03/09/2003 08:00:00	8	0	19.3
03/09/2003 08:15:00	8	15	19.9
03/09/2003 08:30:00	8	30	20
03/09/2003 08:45:00	8	45	19.9
03/09/2003 09:00:00	9	0	20.1
03/09/2003 09:15:00	9	15	19.9
03/09/2003 09:30:00	9	30	20.2
03/09/2003 09:45:00	9	45	19.9
03/09/2003 10:00:00	10	0	20.1
03/09/2003 10:15:00	10	15	20
03/09/2003 10:30:00	10	30	19.4
03/09/2003 10:45:00	10	45	19.6
03/09/2003 11:00:00	11	0	20.6
03/09/2003 11:15:00	11	15	20.2
03/09/2003 11:30:00	11	30	20.1
03/09/2003 11:45:00	11	45	20.1
03/09/2003 12:00:00	12	0	20
03/09/2003 12:15:00	12	15	20.1
03/09/2003 12:30:00	12	30	20.3
03/09/2003 12:45:00	12	45	21.2
03/09/2003 13:00:00	13	0	21.3
03/09/2003 13:15:00	13	15	19.8
03/09/2003 13:30:00	13	30	19.9
03/09/2003 13:45:00	13	45	20.1
03/09/2003 14:00:00	14	0	19.9
03/09/2003 14:15:00	14	15	19.4
03/09/2003 14:30:00	14	30	19.7
03/09/2003 14:45:00	14	45	20.1
03/09/2003 15:00:00	15	0	20
03/09/2003 15:15:00	15	15	19.9
03/09/2003 15:30:00	15	30	20.2
03/09/2003 15:45:00	15	45	19.9
03/09/2003 16:00:00	16	0	20
03/09/2003 16:15:00	16	15	20
03/09/2003 16:30:00	16	30	19.6
03/09/2003 16:45:00	16	45	19.4
03/09/2003 17:00:00	17	0	20.5
03/09/2003 17:15:00	17	15	20.6
03/09/2003 17:30:00	17	30	21.6
03/09/2003 17:45:00	17	45	20.7
03/09/2003 18:00:00	18	0	21.3
03/09/2003 18:15:00	18	15	20.7
03/09/2003 18:30:00	18	30	21.5
03/09/2003 18:45:00	18	45	21.1
03/09/2003 19:00:00	19	0	21.3
03/09/2003 19:15:00	19	15	20.5
03/09/2003 19:30:00	19	30	19.8
03/09/2003 19:45:00	19	45	17.7
03/09/2003 20:00:00	20	0	16.2
03/09/2003 20:15:00	20	15	15.6
03/09/2003 20:30:00	20	30	13.2
03/09/2003 20:45:00	20	45	13.2
03/09/2003 21:00:00	21	0	11.2
03/09/2003 21:15:00	21	15	9.9
03/09/2003 21:30:00	21	30	10
03/09/2003 21:45:00	21	45	10.2
03/09/2003 22:00:00	22	0	9.9
03/09/2003 22:15:00	22	15	9.8
03/09/2003 22:30:00	22	30	10
03/09/2003 22:45:00	22	45	11
03/09/2003 23:00:00	23	0	10.8
03/09/2003 23:15:00	23	15	10.7
03/09/2003 23:30:00	23	30	10.5
03/09/2003 23:45:00	23	45	10.4
03/10/2003 00:00:00	0	0	10.4
03/10/2003 00:15:00	0	15	10.2
03/10/2003 00:30:00	0	30	11.2
03/10/2003 00:45:00	0	45	10.2
03/10/2003 01:00:00	1	0	10.5
03/10/2003 01:15:00	1	15	11
03/10/2003 01:30:00	1	30	10.6
03/10/2003 01:45:00	1	45	10.9
03/10/2003 02:00:00	2	0	9.9
03/10/2003 02:15:00	2	15	10.7
03/10/2003 02:30:00	2	30	10.9
03/10/2003 02:45:00	2	45	10.5
03/10/2003 03:00:00	3	0	10.9
03/10/2003 03:15:00	3	15	10.4
03/10/2003 03:30:00	3	30	11.1
03/10/2003 03:45:00	3	45	10.7
03/10/2003 04:00:00	4	0	10.5
03/10/2003 04:15:00	4	15	10.5
03/10/2003 04:30:00	4	30	10.6
03/10/2003 04:45:00	4	45	11
03/10/2003 05:00:00	5	0	11
03/10/2003 05:15:00	5	15	10.8
03/10/2003 05:30:00	5	30	10.8
03/10/2003 05:45:00	5	45	10.4
03/10/2003 06:00:00	6	0	11.1
03/10/2003 06:15:00	6	15	11.1
03/10/2003 06:30:00	6	30	13.1
03/10/2003 06:45:00	6	45	13.7
03/10/2003 07:00:00	7	0	15.5
03/10/2003 07:15:00	7	15	15.8
03/10/2003 07:30:00	7	30	17.2
03/10/2003 07:45:00	7	45	18
03/10/2003 08:00:00	8	0	19.4
03/10/2003 08:15:00	8	15	19.8
03/10/2003 08:30:00	8	30	20.3
03/10/2003 08:45:00	8	45	19.7
03/10/2003 09:00:00	9	0	20.2
03/10/2003 09:15:00	9	15	20.3
03/10/2003 09:30:00	9	30	20.3
03/10/2003 09:45:00	9	45	19.6
03/10/2003 10:00:00	10	0	19.5
03/10/2003 10:15:00	10	15	19.2
03/10/2003 10:30:00	10	30	19.4
03/10/2003 10:45:00	10	45	19.6
03/10/2003 11:00:00	11	0	20.1
03/10/2003 11:15:00	11	15	19.9
03/10/2003 11:30:00	11	30	20.1
03/10/2003 11:45:00	11	45	20.3
03/10/2003 12:00:00	12	0	21.3
03/10/2003 12:15:00	12	15	21.9
03/10/2003 12:30:00	12	30	23.3
03/10/2003 12:45:00	12	45	24.4
03/10/2003 13:00:00	13	0	24.9
03/10/2003 13:15:00	13	15	25.3
03/10/2003 13:30:00	13	30	25.2
03/10/2003 13:45:00	13	45	24.8
03/10/2003 14:00:00	14	0	24.7
03/10/2003 14:15:00	14	15	24.9
03/10/2003 14:30:00	14	30	24.7
03/10/2003 14:45:00	14	45	24.3
03/10/2003 15:00:00	15	0	24.4
03/10/2003 15:15:00	15	15	24.1
03/10/2003 15:30:00	15	30	24.1
03/10/2003 15:45:00	15	45	23.7
03/10/2003 16:00:00	16	0	23.2
03/10/2003 16:15:00	16	15	23.1
03/10/2003 16:30:00	16	30	23
03/10/2003 16:45:00	16	45	22.8
03/10/2003 17:00:00	17	0	22.4
03/10/2003 17:15:00	17	15	21.6
03/10/2003 17:30:00	17	30	21.5
03/10/2003 17:45:00	17	45	20.9
03/10/2003 18:00:00	18	0	19.6
03/10/2003 18:15:00	18	15	19.5
03/10/2003 18:30:00	18	30	20
03/10/2003 18:45:00	18	45	21.2
03/10/2003 19:00:00	19	0	21.1
03/10/2003 19:15:00	19	15	21.4
03/10/2003 19:30:00	19	30	18.7
03/10/2003 19:45:00	19	45	19.5
03/10/2003 20:00:00	20	0	16.7
03/10/2003 20:15:00	20	15	15.6
03/10/2003 20:30:00	20	30	14.7
03/10/2003 20:45:00	20	45	13
03/10/2003 21:00:00	21	0	11.8
03/10/2003 21:15:00	21	15	11.1
03/10/2003 21:30:00	21	30	10.7
03/10/2003 21:45:00	21	45	10.5
03/10/2003 22:00:00	22	0	10.4
03/10/2003 22:15:00	22	15	10
03/10/2003 22:30:00	22	30	10.1
03/10/2003 22:45:00	22	45	10
03/10/2003 23:00:00	23	0	10
03/10/2003 23:15:00	23	15	9.9
03/10/2003 23:30:00	23	30	10.2
03/10/2003 23:45:00	23	45	9.9
03/11/2003 00:00:00	0	0	10
03/11/2003 00:15:00	0	15	10
03/11/2003 00:30:00	0	30	9.9
03/11/2003 00:45:00	0	45	10
03/11/2003 01:00:00	1	0	10.5
03/11/2003 01:15:00	1	15	11
03/11/2003 01:30:00	1	30	11.2
03/11/2003 01:45:00	1	45	10.9
03/11/2003 02:00:00	2	0	9.7
03/11/2003 02:15:00	2	15	10.1
03/11/2003 02:30:00	2	30	10.1
03/11/2003 02:45:00	2	45	10
03/11/2003 03:00:00	3	0	11
03/11/2003 03:15:00	3	15	9.8
03/11/2003 03:30:00	3	30	10
03/11/2003 03:45:00	3	45	10.1
03/11/2003 04:00:00	4	0	11.5
03/11/2003 04:15:00	4	15	10.2
03/11/2003 04:30:00	4	30	10.6
03/11/2003 04:45:00	4	45	10
03/11/2003 05:00:00	5	0	10
03/11/2003 05:15:00	5	15	10.5
03/11/2003 05:30:00	5	30	10
03/11/2003 05:45:00	5	45	10.2
03/11/2003 06:00:00	6	0	11.7
03/11/2003 06:15:00	6	15	10.7
03/11/2003 06:30:00	6	30	13
03/11/2003 06:45:00	6	45	14.5
03/11/2003 07:00:00	7	0	15.5
03/11/2003 07:15:00	7	15	16.1
03/11/2003 07:30:00	7	30	18.2
03/11/2003 07:45:00	7	45	19.6
03/11/2003 08:00:00	8	0	20.3
03/11/2003 08:15:00	8	15	21.4
03/11/2003 08:30:00	8	30	21.1
03/11/2003 08:45:00	8	45	21.3
03/11/2003 09:00:00	9	0	20.9
03/11/2003 09:15:00	9	15	21.1
03/11/2003 09:30:00	9	30	20.1
03/11/2003 09:45:00	9	45	20.3
03/11/2003 10:00:00	10	0	19.6
03/11/2003 10:15:00	10	15	19.6
03/11/2003 10:30:00	10	30	19.7
03/11/2003 10:45:00	10	45	19.8
03/11/2003 11:00:00	11	0	19.4
03/11/2003 11:15:00	11	15	19.9
03/11/2003 11:30:00	11	30	19.6
03/11/2003 11:45:00	11	45	19.4
03/11/2003 12:00:00	12	0	19.7
03/11/2003 12:15:00	12	15	20.1
03/11/2003 12:30:00	12	30	20.4
03/11/2003 12:45:00	12	45	20.3
03/11/2003 13:00:00	13	0	20.9
03/11/2003 13:15:00	13	15	20
03/11/2003 13:30:00	13	30	20.1
03/11/2003 13:45:00	13	45	20.3
03/11/2003 14:00:00	14	0	20
03/11/2003 14:15:00	14	15	20.9
03/11/2003 14:30:00	14	30	20.3
03/11/2003 14:45:00	14	45	20.4
03/11/2003 15:00:00	15	0	20.9
03/11/2003 15:15:00	15	15	20
03/11/2003 15:30:00	15	30	20.6
03/11/2003 15:45:00	15	45	19.9
03/11/2003 16:00:00	16	0	20.1
03/11/2003 16:15:00	16	15	20.3
03/11/2003 16:30:00	16	30	20.7
03/11/2003 16:45:00	16	45	20.2
03/11/2003 17:00:00	17	0	21.1
03/11/2003 17:15:00	17	15	20.3
03/11/2003 17:30:00	17	30	20.9
03/11/2003 17:45:00	17	45	21.5
03/11/2003 18:00:00	18	0	20.8
03/11/2003 18:15:00	18	15	20.9
03/11/2003 18:30:00	18	30	20.8
03/11/2003 18:45:00	18	45	20.5
03/11/2003 19:00:00	19	0	21.1
03/11/2003 19:15:00	19	15	20.3
03/11/2003 19:30:00	19	30	19.6
03/11/2003 19:45:00	19	45	17.2
03/11/2003 20:00:00	20	0	17.6
03/11/2003 20:15:00	20	15	15
03/11/2003 20:30:00	20	30	13.2
03/11/2003 20:45:00	20	45	12.8
03/11/2003 21:00:00	21	0	11.6
03/11/2003 21:15:00	21	15	10.6
03/11/2003 21:30:00	21	30	10
03/11/2003 21:45:00	21	45	10
03/11/2003 22:00:00	22	0	10.1
03/11/2003 22:15:00	22	15	10
03/11/2003 22:30:00	22	30	10.1
03/11/2003 22:45:00	22	45	10
03/11/2003 23:00:00	23	0	10.7
03/11/2003 23:15:00	23	15	10.3
03/11/2003 23:30:00	23	30	10.3
03/11/2003 23:45:00	23	45	10.2
03/12/2003 00:00:00	0	0	11.8
03/12/2003 00:15:00	0	15	10.2
03/12/2003 00:30:00	0	30	11.1
03/12/2003 00:45:00	0	45	10.3
03/12/2003 01:00:00	1	0	10.2
03/12/2003 01:15:00	1	15	10.2
03/12/2003 01:30:00	1	30	10.5
03/12/2003 01:45:00	1	45	10.5
03/12/2003 02:00:00	2	0	10.3
03/12/2003 02:15:00	2	15	10.1
03/12/2003 02:30:00	2	30	10.6
03/12/2003 02:45:00	2	45	10.8
03/12/2003 03:00:00	3	0	10.8
03/12/2003 03:15:00	3	15	10.4
03/12/2003 03:30:00	3	30	10.8
03/12/2003 03:45:00	3	45	10.2
03/12/2003 04:00:00	4	0	10.4
03/12/2003 04:15:00	4	15	10.3
03/12/2003 04:30:00	4	30	11
03/12/2003 04:45:00	4	45	10.8
03/12/2003 05:00:00	5	0	10.3
03/12/2003 05:15:00	5	15	10.6
03/12/2003 05:30:00	5	30	11.3
03/12/2003 05:45:00	5	45	11.2
03/12/2003 06:00:00	6	0	11
03/12/2003 06:15:00	6	15	11.6
03/12/2003 06:30:00	6	30	12.6
03/12/2003 06:45:00	6	45	13.7
03/12/2003 07:00:00	7	0	14.8
03/12/2003 07:15:00	7	15	16.5
03/12/2003 07:30:00	7	30	17.7
03/12/2003 07:45:00	7	45	18.8
03/12/2003 08:00:00	8	0	19.5
03/12/2003 08:15:00	8	15	20.4
03/12/2003 08:30:00	8	30	20.4
03/12/2003 08:45:00	8	45	20.2
03/12/2003 09:00:00	9	0	20.6
03/12/2003 09:15:00	9	15	19.9
03/12/2003 09:30:00	9	30	20
03/12/2003 09:45:00	9	45	19.7
03/12/2003 10:00:00	10	0	20.2
03/12/2003 10:15:00	10	15	19.8
03/12/2003 10:30:00	10	30	20.3
03/12/2003 10:45:00	10	45	20.1
03/12/2003 11:00:00	11	0	20.7
03/12/2003 11:15:00	11	15	21.9
03/12/2003 11:30:00	11	30	22.9
03/12/2003 11:45:00	11	45	23.5
03/12/2003 12:00:00	12	0	23.5
03/12/2003 12:15:00	12	15	25
03/12/2003 12:30:00	12	30	24.9
03/12/2003 12:45:00	12	45	25.2
03/12/2003 13:00:00	13	0	22.6
03/12/2003 13:15:00	13	15	22.9
03/12/2003 13:30:00	13	30	27.4
03/12/2003 13:45:00	13	45	25.1
03/12/2003 14:00:00	14	0	22.7
03/12/2003 14:15:00	14	15	21.6
03/12/2003 14:30:00	14	30	22.4
03/12/2003 14:45:00	14	45	22.3
03/12/2003 15:00:00	15	0	22.3
03/12/2003 15:15:00	15	15	22.1
03/12/2003 15:30:00	15	30	22.6
03/12/2003 15:45:00	15	45	21.3
03/12/2003 16:00:00	16	0	20.7
03/12/2003 16:15:00	16	15	21.9
03/12/2003 16:30:00	16	30	22.5
03/12/2003 16:45:00	16	45	22.6
03/12/2003 17:00:00	17	0	21.6
03/12/2003 17:15:00	17	15	22.2
03/12/2003 17:30:00	17	30	22.1
03/12/2003 17:45:00	17	45	21.3
03/12/2003 18:00:00	18	0	19.7
03/12/2003 18:15:00	18	15	19.5
03/12/2003 18:30:00	18	30	19.9
03/12/2003 18:45:00	18	45	19.9
03/12/2003 19:00:00	19	0	20.1
03/12/2003 19:15:00	19	15	20.4
03/12/2003 19:30:00	19	30	19.6
03/12/2003 19:45:00	19	45	18.4
03/12/2003 20:00:00	20	0	16.2
03/12/2003 20:15:00	20	15	16.1
03/12/2003 20:30:00	20	30	13.5
03/12/2003 20:45:00	20	45	13.3
03/12/2003 21:00:00	21	0	12.1
03/12/2003 21:15:00	21	15	10.6
03/12/2003 21:30:00	21	30	9.9
03/12/2003 21:45:00	21	45	10.1
03/12/2003 22:00:00	22	0	11.6
03/12/2003 22:15:00	22	15	10.6
03/12/2003 22:30:00	22	30	10.6
03/12/2003 22:45:00	22	45	10.6
03/12/2003 23:00:00	23	0	10.4
03/12/2003 23:15:00	23	15	11.4
03/12/2003 23:30:00	23	30	10.4
03/12/2003 23:45:00	23	45	10.3
03/13/2003 00:00:00	0	0	10.5
03/13/2003 00:15:00	0	15	10.4
03/13/2003 00:30:00	0	30	10.3
03/13/2003 00:45:00	0	45	11.4
03/13/2003 01:00:00	1	0	10.8
03/13/2003 01:15:00	1	15	10.8
03/13/2003 01:30:00	1	30	11.1
03/13/2003 01:45:00	1	45	10.7
03/13/2003 02:00:00	2	0	11.1
03/13/2003 02:15:00	2	15	10.6
03/13/2003 02:30:00	2	30	11.3
03/13/2003 02:45:00	2	45	11.1
03/13/2003 03:00:00	3	0	10.9
03/13/2003 03:15:00	3	15	11
03/13/2003 03:30:00	3	30	10.7
03/13/2003 03:45:00	3	45	10.5
03/13/2003 04:00:00	4	0	10.6
03/13/2003 04:15:00	4	15	10.8
03/13/2003 04:30:00	4	30	11
03/13/2003 04:45:00	4	45	11.3
03/13/2003 05:00:00	5	0	11
03/13/2003 05:15:00	5	15	11.4
03/13/2003 05:30:00	5	30	10.8
03/13/2003 05:45:00	5	45	10.7
03/13/2003 06:00:00	6	0	10.7
03/13/2003 06:15:00	6	15	11.2
03/13/2003 06:30:00	6	30	13
03/13/2003 06:45:00	6	45	13.9
03/13/2003 07:00:00	7	0	15.4
03/13/2003 07:15:00	7	15	16
03/13/2003 07:30:00	7	30	17.4
03/13/2003 07:45:00	7	45	18.1
03/13/2003 08:00:00	8	0	19.5
03/13/2003 08:15:00	8	15	20.2
03/13/2003 08:30:00	8	30	20.3
03/13/2003 08:45:00	8	45	20.3
03/13/2003 09:00:00	9	0	20.4
03/13/2003 09:15:00	9	15	20
03/13/2003 09:30:00	9	30	20
03/13/2003 09:45:00	9	45	20.4
03/13/2003 10:00:00	10	0	20
03/13/2003 10:15:00	10	15	20
03/13/2003 10:30:00	10	30	19.6
03/13/2003 10:45:00	10	45	19.9
03/13/2003 11:00:00	11	0	20
03/13/2003 11:15:00	11	15	20.4
03/13/2003 11:30:00	11	30	21.1
03/13/2003 11:45:00	11	45	21.7
03/13/2003 12:00:00	12	0	23.3
03/13/2003 12:15:00	12	15	24
03/13/2003 12:30:00	12	30	23.8
03/13/2003 12:45:00	12	45	24.6
03/13/2003 13:00:00	13	0	26.2
03/13/2003 13:15:00	13	15	26.7
03/13/2003 13:30:00	13	30	25.7
03/13/2003 13:45:00	13	45	24.8
03/13/2003 14:00:00	14	0	24.3
03/13/2003 14:15:00	14	15	23.7
03/13/2003 14:30:00	14	30	23.6
03/13/2003 14:45:00	14	45	23.9
03/13/2003 15:00:00	15	0	24.1
03/13/2003 15:15:00	15	15	23.3
03/13/2003 15:30:00	15	30	22.5
03/13/2003 15:45:00	15	45	21.7
03/13/2003 16:00:00	16	0	21.1
03/13/2003 16:15:00	16	15	20.1
03/13/2003 16:30:00	16	30	19.8
03/13/2003 16:45:00	16	45	19.3
03/13/2003 17:00:00	17	0	18.8
03/13/2003 17:15:00	17	15	19.4
03/13/2003 17:30:00	17	30	19.8
03/13/2003 17:45:00	17	45	20.1
03/13/2003 18:00:00	18	0	21.1
03/13/2003 18:15:00	18	15	20.4
03/13/2003 18:30:00	18	30	20.7
03/13/2003 18:45:00	18	45	20.7
03/13/2003 19:00:00	19	0	20.5
03/13/2003 19:15:00	19	15	21.3
03/13/2003 19:30:00	19	30	18.7
03/13/2003 19:45:00	19	45	18.2
03/13/2003 20:00:00	20	0	16.3
03/13/2003 20:15:00	20	15	15
03/13/2003 20:30:00	20	30	13.8
03/13/2003 20:45:00	20	45	12.7
03/13/2003 21:00:00	21	0	12
03/13/2003 21:15:00	21	15	11.6
03/13/2003 21:30:00	21	30	11.3
03/13/2003 21:45:00	21	45	11.2
03/13/2003 22:00:00	22	0	11.2
03/13/2003 22:15:00	22	15	10.9
03/13/2003 22:30:00	22	30	10.3
03/13/2003 22:45:00	22	45	10
03/13/2003 23:00:00	23	0	9.7
03/13/2003 23:15:00	23	15	9.9
03/13/2003 23:30:00	23	30	9.8
03/13/2003 23:45:00	23	45	9.7
03/14/2003 00:00:00	0	0	9.9
03/14/2003 00:15:00	0	15	9.9
03/14/2003 00:30:00	0	30	10.4
03/14/2003 00:45:00	0	45	10.1
03/14/2003 01:00:00	1	0	9.8
03/14/2003 01:15:00	1	15	10
03/14/2003 01:30:00	1	30	10.1
03/14/2003 01:45:00	1	45	10.2
03/14/2003 02:00:00	2	0	9.9
03/14/2003 02:15:00	2	15	10.1
03/14/2003 02:30:00	2	30	10
03/14/2003 02:45:00	2	45	10
03/14/2003 03:00:00	3	0	10
03/14/2003 03:15:00	3	15	10.1
03/14/2003 03:30:00	3	30	10.7
03/14/2003 03:45:00	3	45	10.2
03/14/2003 04:00:00	4	0	10
03/14/2003 04:15:00	4	15	10.1
03/14/2003 04:30:00	4	30	10
03/14/2003 04:45:00	4	45	9.9
03/14/2003 05:00:00	5	0	10.1
03/14/2003 05:15:00	5	15	10.1
03/14/2003 05:30:00	5	30	10.1
03/14/2003 05:45:00	5	45	9.9
03/14/2003 06:00:00	6	0	10
03/14/2003 06:15:00	6	15	11
03/14/2003 06:30:00	6	30	11.7
03/14/2003 06:45:00	6	45	14.4
03/14/2003 07:00:00	7	0	15.4
03/14/2003 07:15:00	7	15	16.5
03/14/2003 07:30:00	7	30	17.6
03/14/2003 07:45:00	7	45	19.1
03/14/2003 08:00:00	8	0	20.8
03/14/2003 08:15:00	8	15	21.4
03/14/2003 08:30:00	8	30	21.1
03/14/2003 08:45:00	8	45	21.1
03/14/2003 09:00:00	9	0	20.2
03/14/2003 09:15:00	9	15	21.4
03/14/2003 09:30:00	9	30	20.4
03/14/2003 09:45:00	9	45	20.1
03/14/2003 10:00:00	10	0	20.1
03/14/2003 10:15:00	10	15	19.8
03/14/2003 10:30:00	10	30	19.9
03/14/2003 10:45:00	10	45	20.2
03/14/2003 11:00:00	11	0	21.1
03/14/2003 11:15:00	11	15	20
03/14/2003 11:30:00	11	30	20.1
03/14/2003 11:45:00	11	45	20.2
03/14/2003 12:00:00	12	0	20.3
03/14/2003 12:15:00	12	15	20.1
03/14/2003 12:30:00	12	30	19.9
03/14/2003 12:45:00	12	45	20.3
03/14/2003 13:00:00	13	0	19.8
03/14/2003 13:15:00	13	15	19.8
03/14/2003 13:30:00	13	30	19.9
03/14/2003 13:45:00	13	45	19.9
03/14/2003 14:00:00	14	0	20.3
03/14/2003 14:15:00	14	15	20.4
03/14/2003 14:30:00	14	30	20
03/14/2003 14:45:00	14	45	19.9
03/14/2003 15:00:00	15	0	19.7
03/14/2003 15:15:00	15	15	19.5
03/14/2003 15:30:00	15	30	20.3
03/14/2003 15:45:00	15	45	20.4
03/14/2003 16:00:00	16	0	20.3
03/14/2003 16:15:00	16	15	20.3
03/14/2003 16:30:00	16	30	20.1
03/14/2003 16:45:00	16	45	20.8
03/14/2003 17:00:00	17	0	20.9
03/14/2003 17:15:00	17	15	20.4
03/14/2003 17:30:00	17	30	20.7
03/14/2003 17:45:00	17	45	20.5
03/14/2003 18:00:00	18	0	20.2
03/14/2003 18:15:00	18	15	21.9
03/14/2003 18:30:00	18	30	20.5
03/14/2003 18:45:00	18	45	21.4
03/14/2003 19:00:00	19	0	20.6
03/14/2003 19:15:00	19	15	21.7
03/14/2003 19:30:00	19	30	19.7
03/14/2003 19:45:00	19	45	17.8
03/14/2003 20:00:00	20	0	16.8
03/14/2003 20:15:00	20	15	16.1
03/14/2003 20:30:00	20	30	15.5
03/14/2003 20:45:00	20	45	15.2
03/14/2003 21:00:00	21	0	14.8
03/14/2003 21:15:00	21	15	14.5
03/14/2003 21:30:00	21	30	14.2
03/14/2003 21:45:00	21	45	14.1
03/14/2003 22:00:00	22	0	13.9
03/14/2003 22:15:00	22	15	13.6
03/14/2003 22:30:00	22	30	13
03/14/2003 22:45:00	22	45	12.7
03/14/2003 23:00:00	23	0	12.5
03/14/2003 23:15:00	23	15	12.2
03/14/2003 23:30:00	23	30	11.9
03/14/2003 23:45:00	23	45	11.8
03/15/2003 00:00:00	0	0	11.6
03/15/2003 00:15:00	0	15	11.4
03/15/2003 00:30:00	0	30	11.3
03/15/2003 00:45:00	0	45	11.2
03/15/2003 01:00:00	1	0	11.1
03/15/2003 01:15:00	1	15	11.1
03/15/2003 01:30:00	1	30	10.9
03/15/2003 01:45:00	1	45	10.9
03/15/2003 02:00:00	2	0	10.8
03/15/2003 02:15:00	2	15	10.7
03/15/2003 02:30:00	2	30	10.6
03/15/2003 02:45:00	2	45	10.5
03/15/2003 03:00:00	3	0	10.5
03/15/2003 03:15:00	3	15	10.4
03/15/2003 03:30:00	3	30	10.4
03/15/2003 03:45:00	3	45	10.4
03/15/2003 04:00:00	4	0	10.3
03/15/2003 04:15:00	4	15	10.1
03/15/2003 04:30:00	4	30	10
03/15/2003 04:45:00	4	45	9.8
03/15/2003 05:00:00	5	0	9.9
03/15/2003 05:15:00	5	15	10.2
03/15/2003 05:30:00	5	30	10.1
03/15/2003 05:45:00	5	45	10
03/15/2003 06:00:00	6	0	10.4
03/15/2003 06:15:00	6	15	10.7
03/15/2003 06:30:00	6	30	12.1
03/15/2003 06:45:00	6	45	14.3
03/15/2003 07:00:00	7	0	14.9
03/15/2003 07:15:00	7	15	16.6
03/15/2003 07:30:00	7	30	17.9
03/15/2003 07:45:00	7	45	19.3
03/15/2003 08:00:00	8	0	20.2
03/15/2003 08:15:00	8	15	20.6
03/15/2003 08:30:00	8	30	20.3
03/15/2003 08:45:00	8	45	21.2
03/15/2003 09:00:00	9	0	20.9
03/15/2003 09:15:00	9	15	20.2
03/15/2003 09:30:00	9	30	21.2
03/15/2003 09:45:00	9	45	20.2
03/15/2003 10:00:00	10	0	19.7
03/15/2003 10:15:00	10	15	20.3
03/15/2003 10:30:00	10	30	20.8
03/15/2003 10:45:00	10	45	21.5
03/15/2003 11:00:00	11	0	23
03/15/2003 11:15:00	11	15	24.4
03/15/2003 11:30:00	11	30	25.5
03/15/2003 11:45:00	11	45	26.2
03/15/2003 12:00:00	12	0	26.7
03/15/2003 12:15:00	12	15	26.9
03/15/2003 12:30:00	12	30	26.9
03/15/2003 12:45:00	12	45	26.9
03/15/2003 13:00:00	13	0	27.3
03/15/2003 13:15:00	13	15	27.5
03/15/2003 13:30:00	13	30	27.6
03/15/2003 13:45:00	13	45	27.6
03/15/2003 14:00:00	14	0	27.4
03/15/2003 14:15:00	14	15	27.2
03/15/2003 14:30:00	14	30	27.1
03/15/2003 14:45:00	14	45	27.1
03/15/2003 15:00:00	15	0	27.2
03/15/2003 15:15:00	15	15	27
03/15/2003 15:30:00	15	30	26.8
03/15/2003 15:45:00	15	45	26.4
03/15/2003 16:00:00	16	0	26.1
03/15/2003 16:15:00	16	15	25.9
03/15/2003 16:30:00	16	30	25.4
03/15/2003 16:45:00	16	45	24.9
03/15/2003 17:00:00	17	0	24.3
03/15/2003 17:15:00	17	15	23.9
03/15/2003 17:30:00	17	30	23.5
03/15/2003 17:45:00	17	45	22.8
03/15/2003 18:00:00	18	0	22.1
03/15/2003 18:15:00	18	15	21.4
03/15/2003 18:30:00	18	30	21.1
03/15/2003 18:45:00	18	45	20.4
03/15/2003 19:00:00	19	0	20.2
03/15/2003 19:15:00	19	15	20.4
03/15/2003 19:30:00	19	30	19.5
03/15/2003 19:45:00	19	45	18.3
03/15/2003 20:00:00	20	0	17.4
03/15/2003 20:15:00	20	15	16.9
03/15/2003 20:30:00	20	30	16.5
03/15/2003 20:45:00	20	45	16.2
03/15/2003 21:00:00	21	0	15.8
03/15/2003 21:15:00	21	15	15.4
03/15/2003 21:30:00	21	30	15
03/15/2003 21:45:00	21	45	14.7
03/15/2003 22:00:00	22	0	14.5
03/15/2003 22:15:00	22	15	14
03/15/2003 22:30:00	22	30	13.4
03/15/2003 22:45:00	22	45	13
03/15/2003 23:00:00	23	0	12.8
03/15/2003 23:15:00	23	15	12.5
03/15/2003 23:30:00	23	30	12.4
03/15/2003 23:45:00	23	45	12.1
03/16/2003 00:00:00	0	0	12
03/16/2003 00:15:00	0	15	11.7
03/16/2003 00:30:00	0	30	11.6
03/16/2003 00:45:00	0	45	11.5
03/16/2003 01:00:00	1	0	11.4
03/16/2003 01:15:00	1	15	11.3
03/16/2003 01:30:00	1	30	11.2
03/16/2003 01:45:00	1	45	11
03/16/2003 02:00:00	2	0	10.8
03/16/2003 02:15:00	2	15	10.7
03/16/2003 02:30:00	2	30	10.6
03/16/2003 02:45:00	2	45	10.6
03/16/2003 03:00:00	3	0	10.7
03/16/2003 03:15:00	3	15	10.8
03/16/2003 03:30:00	3	30	10.8
03/16/2003 03:45:00	3	45	10.8
03/16/2003 04:00:00	4	0	10.8
03/16/2003 04:15:00	4	15	10.7
03/16/2003 04:30:00	4	30	10.7
03/16/2003 04:45:00	4	45	10.6
03/16/2003 05:00:00	5	0	10.5
03/16/2003 05:15:00	5	15	10.4
03/16/2003 05:30:00	5	30	10.3
03/16/2003 05:45:00	5	45	10.3
03/16/2003 06:00:00	6	0	10.1
03/16/2003 06:15:00	6	15	10.3
03/16/2003 06:30:00	6	30	11.8
03/16/2003 06:45:00	6	45	13.1
03/16/2003 07:00:00	7	0	15.8
03/16/2003 07:15:00	7	15	16.5
03/16/2003 07:30:00	7	30	17.3
03/16/2003 07:45:00	7	45	19
03/16/2003 08:00:00	8	0	20.4
03/16/2003 08:15:00	8	15	21.3
03/16/2003 08:30:00	8	30	20.9
03/16/2003 08:45:00	8	45	20.8
03/16/2003 09:00:00	9	0	20.3
03/16/2003 09:15:00	9	15	20
03/16/2003 09:30:00	9	30	20.1
03/16/2003 09:45:00	9	45	21.1
03/16/2003 10:00:00	10	0	22.6
03/16/2003 10:15:00	10	15	24
03/16/2003 10:30:00	10	30	24.7
03/16/2003 10:45:00	10	45	25.7
03/16/2003 11:00:00	11	0	26.5
03/16/2003 11:15:00	11	15	27
03/16/2003 11:30:00	11	30	27.3
03/16/2003 11:45:00	11	45	27.6
03/16/2003 12:00:00	12	0	27.8
03/16/2003 12:15:00	12	15	28.1
03/16/2003 12:30:00	12	30	28.3
03/16/2003 12:45:00	12	45	28.6
03/16/2003 13:00:00	13	0	28.9
03/16/2003 13:15:00	13	15	29.5
03/16/2003 13:30:00	13	30	30.2
03/16/2003 13:45:00	13	45	30
03/16/2003 14:00:00	14	0	29.2
03/16/2003 14:15:00	14	15	28.6
03/16/2003 14:30:00	14	30	28.2
03/16/2003 14:45:00	14	45	27.9
03/16/2003 15:00:00	15	0	28.2
03/16/2003 15:15:00	15	15	28
03/16/2003 15:30:00	15	30	27.7
03/16/2003 15:45:00	15	45	27.5
03/16/2003 16:00:00	16	0	27.6
03/16/2003 16:15:00	16	15	27.5
03/16/2003 16:30:00	16	30	27
03/16/2003 16:45:00	16	45	26
03/16/2003 17:00:00	17	0	25.2
03/16/2003 17:15:00	17	15	24.4
03/16/2003 17:30:00	17	30	23.5
03/16/2003 17:45:00	17	45	22.8
03/16/2003 18:00:00	18	0	22.7
03/16/2003 18:15:00	18	15	22.4
03/16/2003 18:30:00	18	30	22.1
03/16/2003 18:45:00	18	45	21.7
03/16/2003 19:00:00	19	0	21.2
03/16/2003 19:15:00	19	15	20.7
03/16/2003 19:30:00	19	30	20.1
03/16/2003 19:45:00	19	45	19.5
03/16/2003 20:00:00	20	0	18.9
03/16/2003 20:15:00	20	15	18.5
03/16/2003 20:30:00	20	30	17.8
03/16/2003 20:45:00	20	45	17.4
03/16/2003 21:00:00	21	0	16.8
03/16/2003 21:15:00	21	15	16.1
03/16/2003 21:30:00	21	30	15.5
03/16/2003 21:45:00	21	45	15
03/16/2003 22:00:00	22	0	14.8
03/16/2003 22:15:00	22	15	14.4
03/16/2003 22:30:00	22	30	13.9
03/16/2003 22:45:00	22	45	13.5
03/16/2003 23:00:00	23	0	13.2
03/16/2003 23:15:00	23	15	13
03/16/2003 23:30:00	23	30	13.2
03/16/2003 23:45:00	23	45	13.5
03/17/2003 00:00:00	0	0	13.5
03/17/2003 00:15:00	0	15	13.4
03/17/2003 00:30:00	0	30	13.5
03/17/2003 00:45:00	0	45	13.5
03/17/2003 01:00:00	1	0	13.4
03/17/2003 01:15:00	1	15	13.2
03/17/2003 01:30:00	1	30	13.1
03/17/2003 01:45:00	1	45	12.9
03/17/2003 02:00:00	2	0	12.9
03/17/2003 02:15:00	2	15	12.7
03/17/2003 02:30:00	2	30	12.6
03/17/2003 02:45:00	2	45	12.5
03/17/2003 03:00:00	3	0	12.3
03/17/2003 03:15:00	3	15	12.3
03/17/2003 03:30:00	3	30	12.6
03/17/2003 03:45:00	3	45	12.7
03/17/2003 04:00:00	4	0	12.6
03/17/2003 04:15:00	4	15	12.6
03/17/2003 04:30:00	4	30	12.5
03/17/2003 04:45:00	4	45	12.5
03/17/2003 05:00:00	5	0	12.4
03/17/2003 05:15:00	5	15	12.4
03/17/2003 05:30:00	5	30	12.2
03/17/2003 05:45:00	5	45	12.2
03/17/2003 06:00:00	6	0	12.2
03/17/2003 06:15:00	6	15	12.4
03/17/2003 06:30:00	6	30	12.9
03/17/2003 06:45:00	6	45	13.3
03/17/2003 07:00:00	7	0	14.1
03/17/2003 07:15:00	7	15	16.7
03/17/2003 07:30:00	7	30	17.7
03/17/2003 07:45:00	7	45	18.6
03/17/2003 08:00:00	8	0	20.3
03/17/2003 08:15:00	8	15	21.5
03/17/2003 08:30:00	8	30	20.5
03/17/2003 08:45:00	8	45	20.2
03/17/2003 09:00:00	9	0	20.1
03/17/2003 09:15:00	9	15	19.9
03/17/2003 09:30:00	9	30	20
03/17/2003 09:45:00	9	45	20
03/17/2003 10:00:00	10	0	20
03/17/2003 10:15:00	10	15	20.3
03/17/2003 10:30:00	10	30	20.6
03/17/2003 10:45:00	10	45	21.1
03/17/2003 11:00:00	11	0	21.5
03/17/2003 11:15:00	11	15	22
03/17/2003 11:30:00	11	30	22.5
03/17/2003 11:45:00	11	45	23
03/17/2003 12:00:00	12	0	23.3
03/17/2003 12:15:00	12	15	23.7
03/17/2003 12:30:00	12	30	23.8
03/17/2003 12:45:00	12	45	24
03/17/2003 13:00:00	13	0	24.1
03/17/2003 13:15:00	13	15	23.9
03/17/2003 13:30:00	13	30	23.5
03/17/2003 13:45:00	13	45	23.5
03/17/2003 14:00:00	14	0	23.8
03/17/2003 14:15:00	14	15	24.3
03/17/2003 14:30:00	14	30	24.6
03/17/2003 14:45:00	14	45	24.5
03/17/2003 15:00:00	15	0	24.2
03/17/2003 15:15:00	15	15	24
03/17/2003 15:30:00	15	30	23.6
03/17/2003 15:45:00	15	45	23.3
03/17/2003 16:00:00	16	0	23
03/17/2003 16:15:00	16	15	23
03/17/2003 16:30:00	16	30	22.9
03/17/2003 16:45:00	16	45	22.7
03/17/2003 17:00:00	17	0	22.5
03/17/2003 17:15:00	17	15	23.2
03/17/2003 17:30:00	17	30	22.3
03/17/2003 17:45:00	17	45	21.5
03/17/2003 18:00:00	18	0	20.9
03/17/2003 18:15:00	18	15	20.5
03/17/2003 18:30:00	18	30	20.2
03/17/2003 18:45:00	18	45	20.1
03/17/2003 19:00:00	19	0	21.2
03/17/2003 19:15:00	19	15	20.4
03/17/2003 19:30:00	19	30	19.5
03/17/2003 19:45:00	19	45	19
03/17/2003 20:00:00	20	0	18.5
03/17/2003 20:15:00	20	15	18.1
03/17/2003 20:30:00	20	30	17.8
03/17/2003 20:45:00	20	45	17.4
03/17/2003 21:00:00	21	0	16.9
03/17/2003 21:15:00	21	15	16.4
03/17/2003 21:30:00	21	30	16
03/17/2003 21:45:00	21	45	15.6
03/17/2003 22:00:00	22	0	15.3
03/17/2003 22:15:00	22	15	15
03/17/2003 22:30:00	22	30	14.5
03/17/2003 22:45:00	22	45	14.4
03/17/2003 23:00:00	23	0	14.2
03/17/2003 23:15:00	23	15	14.1
03/17/2003 23:30:00	23	30	14
03/17/2003 23:45:00	23	45	13.9
03/18/2003 00:00:00	0	0	13.8
03/18/2003 00:15:00	0	15	13.6
03/18/2003 00:30:00	0	30	13.4
03/18/2003 00:45:00	0	45	13.4
03/18/2003 01:00:00	1	0	13.2
03/18/2003 01:15:00	1	15	13.2
03/18/2003 01:30:00	1	30	13.1
03/18/2003 01:45:00	1	45	13
03/18/2003 02:00:00	2	0	13
03/18/2003 02:15:00	2	15	12.9
03/18/2003 02:30:00	2	30	12.9
03/18/2003 02:45:00	2	45	12.8
03/18/2003 03:00:00	3	0	12.7
03/18/2003 03:15:00	3	15	12.7
03/18/2003 03:30:00	3	30	12.6
03/18/2003 03:45:00	3	45	12.4
03/18/2003 04:00:00	4	0	12.2
03/18/2003 04:15:00	4	15	12.1
03/18/2003 04:30:00	4	30	12
03/18/2003 04:45:00	4	45	12
03/18/2003 05:00:00	5	0	12
03/18/2003 05:15:00	5	15	12
03/18/2003 05:30:00	5	30	12
03/18/2003 05:45:00	5	45	11.9
03/18/2003 06:00:00	6	0	11.9
03/18/2003 06:15:00	6	15	12.1
03/18/2003 06:30:00	6	30	12.6
03/18/2003 06:45:00	6	45	13
03/18/2003 07:00:00	7	0	15
03/18/2003 07:15:00	7	15	15.9
03/18/2003 07:30:00	7	30	18
03/18/2003 07:45:00	7	45	19.2
03/18/2003 08:00:00	8	0	20
03/18/2003 08:15:00	8	15	20.7
03/18/2003 08:30:00	8	30	20.7
03/18/2003 08:45:00	8	45	21.2
03/18/2003 09:00:00	9	0	20
03/18/2003 09:15:00	9	15	20.6
03/18/2003 09:30:00	9	30	20
03/18/2003 09:45:00	9	45	21.5
03/18/2003 10:00:00	10	0	20.2
03/18/2003 10:15:00	10	15	19.7
03/18/2003 10:30:00	10	30	19.8
03/18/2003 10:45:00	10	45	20.1
03/18/2003 11:00:00	11	0	20.3
03/18/2003 11:15:00	11	15	20.4
03/18/2003 11:30:00	11	30	21.2
03/18/2003 11:45:00	11	45	24
03/18/2003 12:00:00	12	0	26.6
03/18/2003 12:15:00	12	15	27.7
03/18/2003 12:30:00	12	30	28.1
03/18/2003 12:45:00	12	45	28.4
03/18/2003 13:00:00	13	0	29.3
03/18/2003 13:15:00	13	15	30
03/18/2003 13:30:00	13	30	30.2
03/18/2003 13:45:00	13	45	30.6
03/18/2003 14:00:00	14	0	29.9
03/18/2003 14:15:00	14	15	29.4
03/18/2003 14:30:00	14	30	29.2
03/18/2003 14:45:00	14	45	29.1
03/18/2003 15:00:00	15	0	29
03/18/2003 15:15:00	15	15	28.7
03/18/2003 15:30:00	15	30	28.5
03/18/2003 15:45:00	15	45	28.1
03/18/2003 16:00:00	16	0	27.8
03/18/2003 16:15:00	16	15	27.8
03/18/2003 16:30:00	16	30	27.5
03/18/2003 16:45:00	16	45	27.2
03/18/2003 17:00:00	17	0	26.8
03/18/2003 17:15:00	17	15	26.4
03/18/2003 17:30:00	17	30	26.7
03/18/2003 17:45:00	17	45	26.6
03/18/2003 18:00:00	18	0	26.4
03/18/2003 18:15:00	18	15	25.8
03/18/2003 18:30:00	18	30	24.5
03/18/2003 18:45:00	18	45	25.8
03/18/2003 19:00:00	19	0	26.6
03/18/2003 19:15:00	19	15	26.2
03/18/2003 19:30:00	19	30	26.1
03/18/2003 19:45:00	19	45	26.4
03/18/2003 20:00:00	20	0	26
03/18/2003 20:15:00	20	15	25.8
03/18/2003 20:30:00	20	30	25.9
03/18/2003 20:45:00	20	45	26.2
03/18/2003 21:00:00	21	0	25.8
03/18/2003 21:15:00	21	15	25.5
03/18/2003 21:30:00	21	30	25.7
03/18/2003 21:45:00	21	45	26
03/18/2003 22:00:00	22	0	25.8
03/18/2003 22:15:00	22	15	24.7
03/18/2003 22:30:00	22	30	22.9
03/18/2003 22:45:00	22	45	20.6
03/18/2003 23:00:00	23	0	19.2
03/18/2003 23:15:00	23	15	18
03/18/2003 23:30:00	23	30	17.1
03/18/2003 23:45:00	23	45	16.4
03/19/2003 00:00:00	0	0	15.8
03/19/2003 00:15:00	0	15	15.3
03/19/2003 00:30:00	0	30	14.8
03/19/2003 00:45:00	0	45	14.3
03/19/2003 01:00:00	1	0	13.9
03/19/2003 01:15:00	1	15	13.4
03/19/2003 01:30:00	1	30	13.1
03/19/2003 01:45:00	1	45	12.8
03/19/2003 02:00:00	2	0	12.6
03/19/2003 02:15:00	2	15	12.4
03/19/2003 02:30:00	2	30	12.3
03/19/2003 02:45:00	2	45	12.2
03/19/2003 03:00:00	3	0	12.1
03/19/2003 03:15:00	3	15	11.9
03/19/2003 03:30:00	3	30	11.8
03/19/2003 03:45:00	3	45	11.6
03/19/2003 04:00:00	4	0	11.5
03/19/2003 04:15:00	4	15	11.4
03/19/2003 04:30:00	4	30	12.2
03/19/2003 04:45:00	4	45	14.5
03/19/2003 05:00:00	5	0	16.7
03/19/2003 05:15:00	5	15	18.3
03/19/2003 05:30:00	5	30	20.2
03/19/2003 05:45:00	5	45	22.7
03/19/2003 06:00:00	6	0	24.2
03/19/2003 06:15:00	6	15	25.6
03/19/2003 06:30:00	6	30	25.5
03/19/2003 06:45:00	6	45	25.6
03/19/2003 07:00:00	7	0	25.2
03/19/2003 07:15:00	7	15	25.3
03/19/2003 07:30:00	7	30	25.2
03/19/2003 07:45:00	7	45	25.2
03/19/2003 08:00:00	8	0	25.1
03/19/2003 08:15:00	8	15	25.1
03/19/2003 08:30:00	8	30	24.8
03/19/2003 08:45:00	8	45	25.4
03/19/2003 09:00:00	9	0	24.6
03/19/2003 09:15:00	9	15	25
03/19/2003 09:30:00	9	30	24.8
03/19/2003 09:45:00	9	45	25.3
03/19/2003 10:00:00	10	0	25.6
03/19/2003 10:15:00	10	15	26.4
03/19/2003 10:30:00	10	30	27.1
03/19/2003 10:45:00	10	45	28.2
03/19/2003 11:00:00	11	0	29.1
03/19/2003 11:15:00	11	15	29.6
03/19/2003 11:30:00	11	30	30
03/19/2003 11:45:00	11	45	30.6
03/19/2003 12:00:00	12	0	31
03/19/2003 12:15:00	12	15	31.3
03/19/2003 12:30:00	12	30	31.6
03/19/2003 12:45:00	12	45	31.9
03/19/2003 13:00:00	13	0	32.3
03/19/2003 13:15:00	13	15	32.6
03/19/2003 13:30:00	13	30	32.6
03/19/2003 13:45:00	13	45	32.6
03/19/2003 14:00:00	14	0	32.7
03/19/2003 14:15:00	14	15	32.6
03/19/2003 14:30:00	14	30	32.5
03/19/2003 14:45:00	14	45	32.2
03/19/2003 15:00:00	15	0	32.1
03/19/2003 15:15:00	15	15	32
03/19/2003 15:30:00	15	30	31.8
03/19/2003 15:45:00	15	45	31.4
03/19/2003 16:00:00	16	0	31.1
03/19/2003 16:15:00	16	15	31
03/19/2003 16:30:00	16	30	30.6
03/19/2003 16:45:00	16	45	30.2
03/19/2003 17:00:00	17	0	29.8
03/19/2003 17:15:00	17	15	29.1
03/19/2003 17:30:00	17	30	28.3
03/19/2003 17:45:00	17	45	27.6
03/19/2003 18:00:00	18	0	26.7
03/19/2003 18:15:00	18	15	26
03/19/2003 18:30:00	18	30	25.8
03/19/2003 18:45:00	18	45	25.2
03/19/2003 19:00:00	19	0	24.5
03/19/2003 19:15:00	19	15	25.2
03/19/2003 19:30:00	19	30	25.2
03/19/2003 19:45:00	19	45	25.3
03/19/2003 20:00:00	20	0	25.6
03/19/2003 20:15:00	20	15	25.6
03/19/2003 20:30:00	20	30	26.1
03/19/2003 20:45:00	20	45	25.6
03/19/2003 21:00:00	21	0	25.4
03/19/2003 21:15:00	21	15	26
03/19/2003 21:30:00	21	30	25.4
03/19/2003 21:45:00	21	45	25.5
03/19/2003 22:00:00	22	0	25.3
03/19/2003 22:15:00	22	15	25.6
03/19/2003 22:30:00	22	30	23.2
03/19/2003 22:45:00	22	45	21.4
03/19/2003 23:00:00	23	0	20.3
03/19/2003 23:15:00	23	15	19.4
03/19/2003 23:30:00	23	30	18.7
03/19/2003 23:45:00	23	45	18.2
03/20/2003 00:00:00	0	0	17.5
03/20/2003 00:15:00	0	15	16.9
03/20/2003 00:30:00	0	30	16.3
03/20/2003 00:45:00	0	45	16
03/20/2003 01:00:00	1	0	15.7
03/20/2003 01:15:00	1	15	15.5
03/20/2003 01:30:00	1	30	15.3
03/20/2003 01:45:00	1	45	15.1
03/20/2003 02:00:00	2	0	14.8
03/20/2003 02:15:00	2	15	14.6
03/20/2003 02:30:00	2	30	14.6
03/20/2003 02:45:00	2	45	14.5
03/20/2003 03:00:00	3	0	14.5
03/20/2003 03:15:00	3	15	14.3
03/20/2003 03:30:00	3	30	14.4
03/20/2003 03:45:00	3	45	14.5
03/20/2003 04:00:00	4	0	14.5
03/20/2003 04:15:00	4	15	14.7
03/20/2003 04:30:00	4	30	15
03/20/2003 04:45:00	4	45	15.2
03/20/2003 05:00:00	5	0	15.3
03/20/2003 05:15:00	5	15	18.2
03/20/2003 05:30:00	5	30	20.1
03/20/2003 05:45:00	5	45	21.9
03/20/2003 06:00:00	6	0	23.7
03/20/2003 06:15:00	6	15	25.4
03/20/2003 06:30:00	6	30	25.6
03/20/2003 06:45:00	6	45	25.5
03/20/2003 07:00:00	7	0	25.5
03/20/2003 07:15:00	7	15	25.4
03/20/2003 07:30:00	7	30	25.6
03/20/2003 07:45:00	7	45	25.7
03/20/2003 08:00:00	8	0	25.5
03/20/2003 08:15:00	8	15	25.2
03/20/2003 08:30:00	8	30	25.8
03/20/2003 08:45:00	8	45	25.7
03/20/2003 09:00:00	9	0	25.2
03/20/2003 09:15:00	9	15	25.6
03/20/2003 09:30:00	9	30	25.4
03/20/2003 09:45:00	9	45	24.6
03/20/2003 10:00:00	10	0	25.4
03/20/2003 10:15:00	10	15	25.9
03/20/2003 10:30:00	10	30	25.7
03/20/2003 10:45:00	10	45	24.7
03/20/2003 11:00:00	11	0	24.6
03/20/2003 11:15:00	11	15	24.7
03/20/2003 11:30:00	11	30	24.7
03/20/2003 11:45:00	11	45	25.3
03/20/2003 12:00:00	12	0	25.9
03/20/2003 12:15:00	12	15	25.4
03/20/2003 12:30:00	12	30	26
03/20/2003 12:45:00	12	45	24.8
03/20/2003 13:00:00	13	0	26
03/20/2003 13:15:00	13	15	25
03/20/2003 13:30:00	13	30	25.7
03/20/2003 13:45:00	13	45	25.6
03/20/2003 14:00:00	14	0	25.9
03/20/2003 14:15:00	14	15	25.9
03/20/2003 14:30:00	14	30	25.4
03/20/2003 14:45:00	14	45	25.9
03/20/2003 15:00:00	15	0	25.7
03/20/2003 15:15:00	15	15	25.2
03/20/2003 15:30:00	15	30	25.5
03/20/2003 15:45:00	15	45	25.3
03/20/2003 16:00:00	16	0	25.2
03/20/2003 16:15:00	16	15	25.9
03/20/2003 16:30:00	16	30	25.6
03/20/2003 16:45:00	16	45	25.3
03/20/2003 17:00:00	17	0	25.8
03/20/2003 17:15:00	17	15	25.9
03/20/2003 17:30:00	17	30	25.6
03/20/2003 17:45:00	17	45	25.5
03/20/2003 18:00:00	18	0	26
03/20/2003 18:15:00	18	15	26
03/20/2003 18:30:00	18	30	26.6
03/20/2003 18:45:00	18	45	26.8
03/20/2003 19:00:00	19	0	27.2
03/20/2003 19:15:00	19	15	26.9
03/20/2003 19:30:00	19	30	26.6
03/20/2003 19:45:00	19	45	26.3
03/20/2003 20:00:00	20	0	26.2
03/20/2003 20:15:00	20	15	26
03/20/2003 20:30:00	20	30	25.5
03/20/2003 20:45:00	20	45	26.3
03/20/2003 21:00:00	21	0	25.8
03/20/2003 21:15:00	21	15	25.6
03/20/2003 21:30:00	21	30	25.5
03/20/2003 21:45:00	21	45	26
03/20/2003 22:00:00	22	0	25.5
03/20/2003 22:15:00	22	15	24.9
03/20/2003 22:30:00	22	30	22.9
03/20/2003 22:45:00	22	45	21.6
03/20/2003 23:00:00	23	0	20.6
03/20/2003 23:15:00	23	15	19.9
03/20/2003 23:30:00	23	30	19.2
03/20/2003 23:45:00	23	45	18.7
03/21/2003 00:00:00	0	0	18.1
03/21/2003 00:15:00	0	15
03/21/2003 00:30:00	0	30	17
03/21/2003 00:45:00	0	45	16.7
03/21/2003 01:00:00	1	0	16.4
03/21/2003 01:15:00	1	15	16.1
03/21/2003 01:30:00	1	30	15.9
03/21/2003 01:45:00	1	45	15.7
03/21/2003 02:00:00	2	0	15.6
03/21/2003 02:15:00	2	15	15.6
03/21/2003 02:30:00	2	30	15.5
03/21/2003 02:45:00	2	45	15.4
03/21/2003 03:00:00	3	0	15.4
03/21/2003 03:15:00	3	15	15.3
03/21/2003 03:30:00	3	30	15.1
03/21/2003 03:45:00	3	45	15
03/21/2003 04:00:00	4	0	14.9
03/21/2003 04:15:00	4	15	14.8
03/21/2003 04:30:00	4	30	14.8
03/21/2003 04:45:00	4	45	15.1
03/21/2003 05:00:00	5	0	15.9
03/21/2003 05:15:00	5	15	18
03/21/2003 05:30:00	5	30	20.3
03/21/2003 05:45:00	5	45	22.2
03/21/2003 06:00:00	6	0	24
03/21/2003 06:15:00	6	15	25.7
03/21/2003 06:30:00	6	30	25.5
03/21/2003 06:45:00	6	45	25.3
03/21/2003 07:00:00	7	0	25.4
03/21/2003 07:15:00	7	15	25.4
03/21/2003 07:30:00	7	30	25.8
03/21/2003 07:45:00	7	45	25.5
03/21/2003 08:00:00	8	0	25.5
03/21/2003 08:15:00	8	15	25.3
03/21/2003 08:30:00	8	30	25.3
03/21/2003 08:45:00	8	45	25.8
03/21/2003 09:00:00	9	0	25.6
03/21/2003 09:15:00	9	15	25.2
03/21/2003 09:30:00	9	30	25.5
03/21/2003 09:45:00	9	45	25.9
03/21/2003 10:00:00	10	0	25.1
03/21/2003 10:15:00	10	15	24.8
03/21/2003 10:30:00	10	30	24.8
03/21/2003 10:45:00	10	45	26
03/21/2003 11:00:00	11	0	25.2
03/21/2003 11:15:00	11	15	25.3
03/21/2003 11:30:00	11	30	25.5
03/21/2003 11:45:00	11	45	25.4
03/21/2003 12:00:00	12	0	25.3
03/21/2003 12:15:00	12	15	25.1
03/21/2003 12:30:00	12	30	25
03/21/2003 12:45:00	12	45	24.8
03/21/2003 13:00:00	13	0	24.8
03/21/2003 13:15:00	13	15	25.5
03/21/2003 13:30:00	13	30	24.8
03/21/2003 13:45:00	13	45	25.2
03/21/2003 14:00:00	14	0	24.9
03/21/2003 14:15:00	14	15	24.9
03/21/2003 14:30:00	14	30	25.9
03/21/2003 14:45:00	14	45	26
03/21/2003 15:00:00	15	0	25.9
03/21/2003 15:15:00	15	15	26
03/21/2003 15:30:00	15	30	25.9
03/21/2003 15:45:00	15	45	25.9
03/21/2003 16:00:00	16	0	25.6
03/21/2003 16:15:00	16	15	24.8
03/21/2003 16:30:00	16	30	25.8
03/21/2003 16:45:00	16	45	25.6
03/21/2003 17:00:00	17	0	25.6
03/21/2003 17:15:00	17	15	25.2
03/21/2003 17:30:00	17	30	25.3
03/21/2003 17:45:00	17	45	25.6
03/21/2003 18:00:00	18	0	25.6
03/21/2003 18:15:00	18	15	25.4
03/21/2003 18:30:00	18	30	25.4
03/21/2003 18:45:00	18	45	26
03/21/2003 19:00:00	19	0	25.2
03/21/2003 19:15:00	19	15	25.5
03/21/2003 19:30:00	19	30	25.3
03/21/2003 19:45:00	19	45	25.4
[truncated: 13,655 more rows]
[truncated: 1 more columns]
